# Supplementary material
Source: PubMed Central journal article supplement (PMC4479040)
Supplement: ncomms8121-s1.pdf [file ncomms8121-s1.pdf]

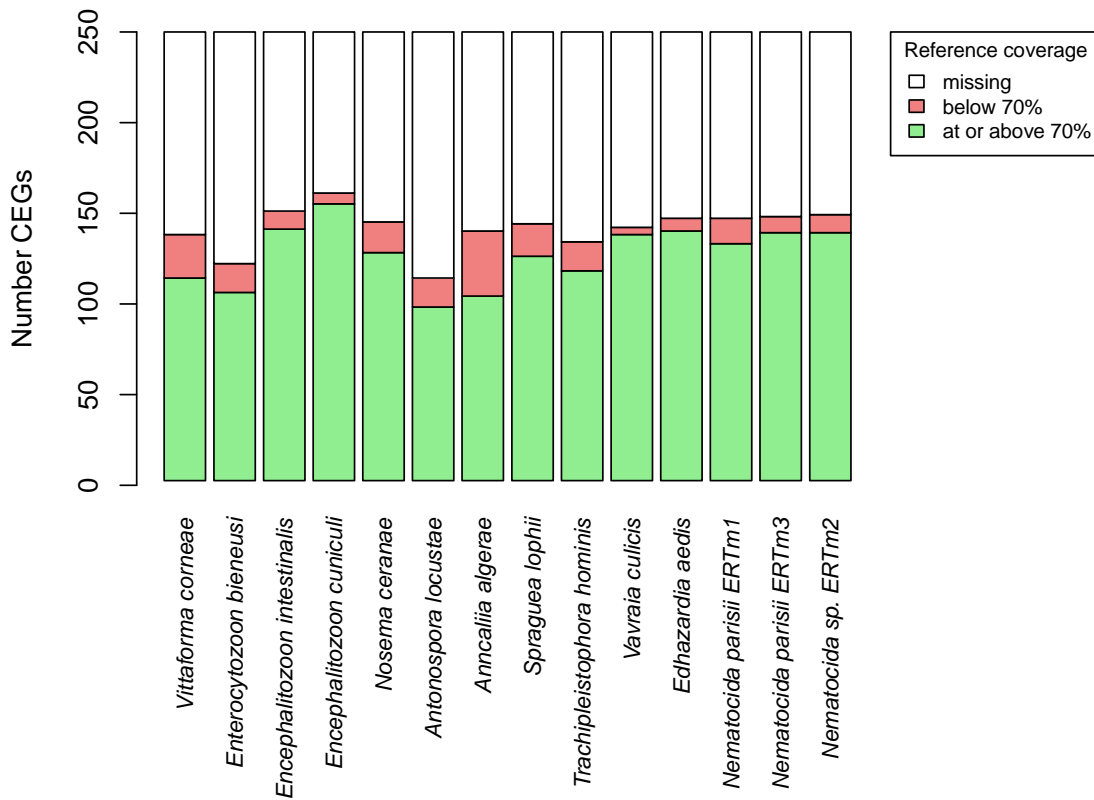

**Supplementary Figure 1.** Conservation of core eukaryotic gene (CEG) set across Microsporidia genomes. The percent coverage of genes with significant Blast similarity is shown for alignments above and below the recommended 70% coverage threshold, which can indicate partial gene structures.

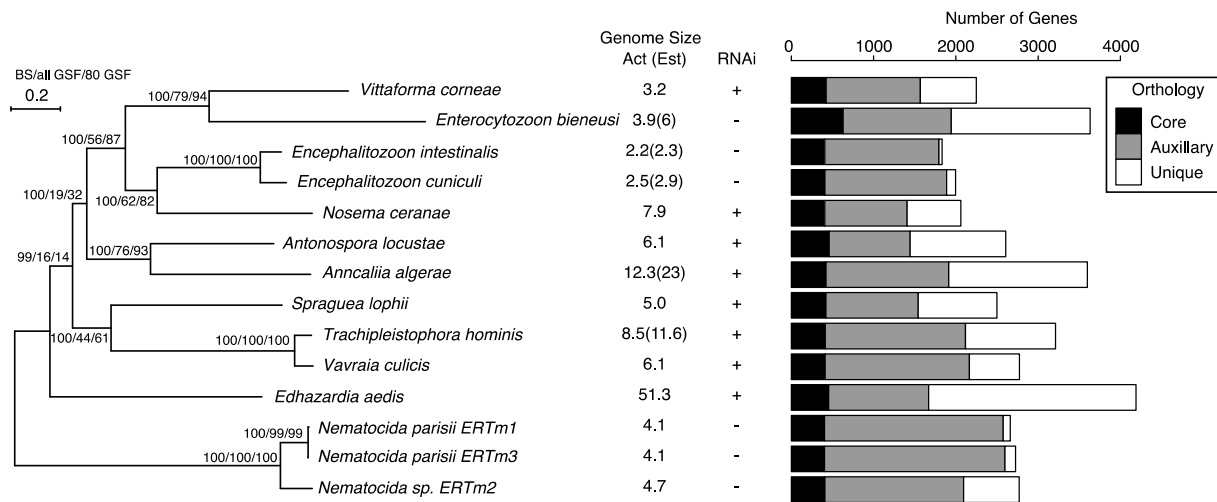

**Supplementary Figure 2.** Phylogeny of Microsporidia based on 217 single copy core genes. The phylogeny was estimated using RAXML<sup>1</sup> and a PROTCATLG model of evolution. Bootstrap support (BS) and gene support frequency (all GSF) is shown above each node. In an attempt to increase GSF, we re-estimated the phylogeny with the 71 genes with an average bootstrap value of 80 or higher. The resulting phylogeny was identical in topology and bootstrap support to the original tree, and showed increased GSF (80 GSF) across most nodes. Genome size (as actual and estimated), presence or absence of RNAi machinery, and ortholog distribution is also shown (core, in all genomes; auxillary, in two or more genomes; unique, in one genome).

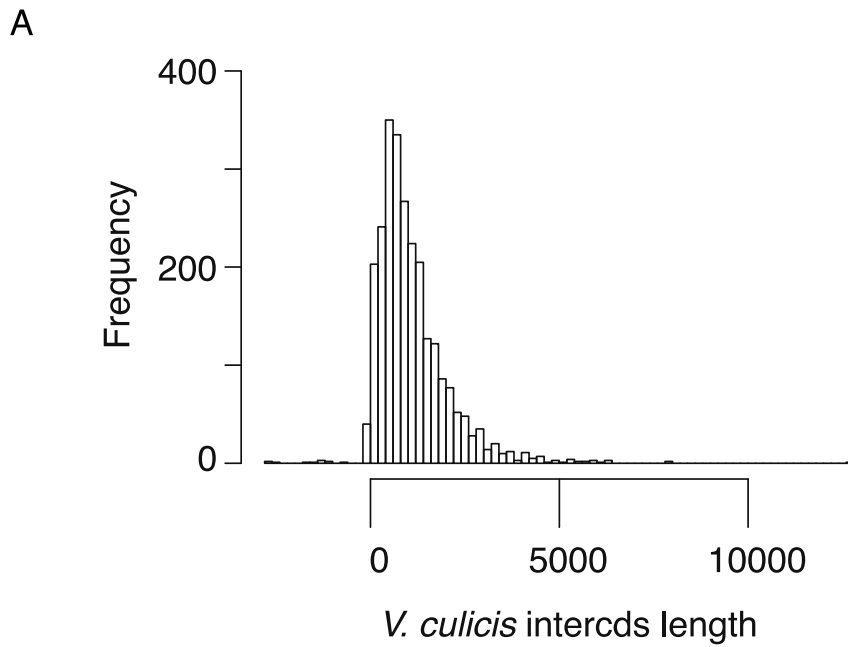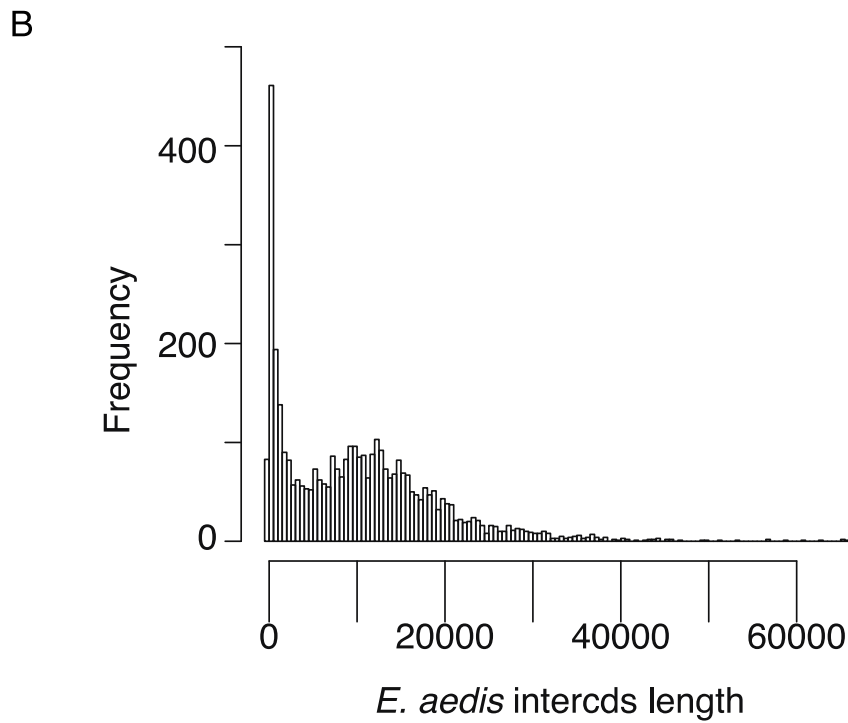

**Supplementary Figure 3.** Intergenic region distribution for *E. aedis* and *V. culicis*. The distribution of regions length between the start and stop of adjacent CDS is shown for A. *V. culicis* and B. *E. aedis*.

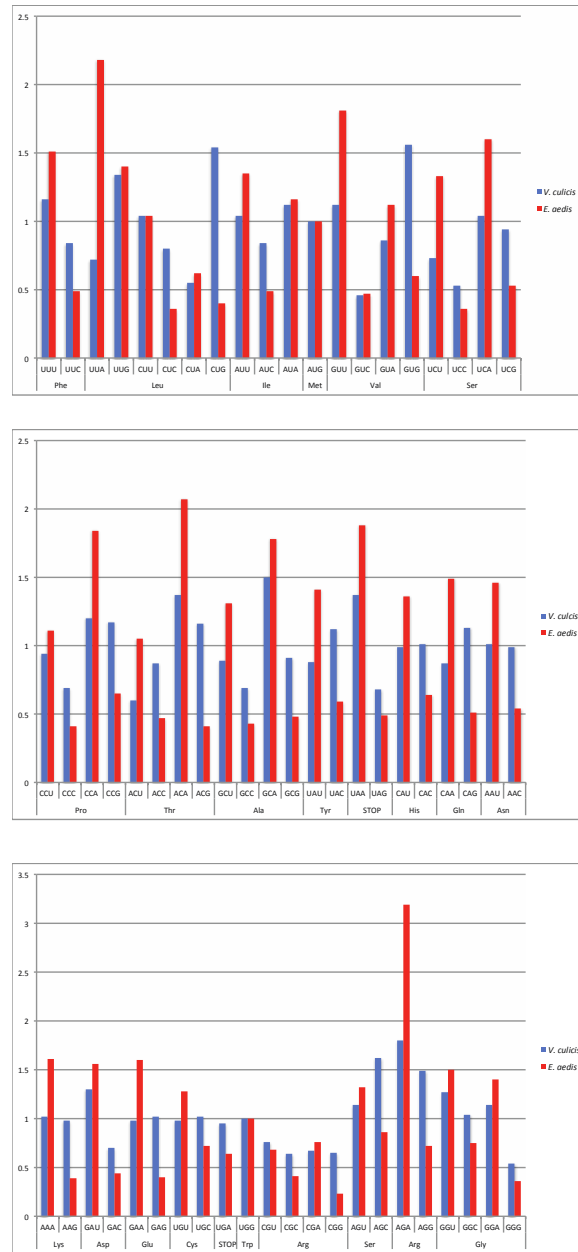

**Supplementary Figure 4.** Codon usage in *E. aedis* and *V. culicis* protein coding genes. The normalized relative usage for codons for the same amino acid is plotted for each species.

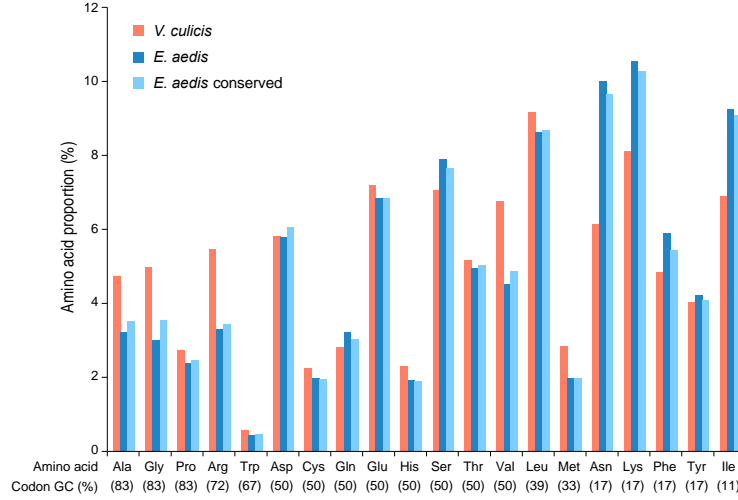

**Supplementary Figure 5.** Bias in amino acid usage in *E. aedis*. The overall proportion of different amino acids found in protein coding genes was computed for *E. aedis* (blue) and *V. culicis* (orange); for *E. aedis* both the set of all genes (dark blue) or the subset of genes conserved in at least one other species (light blue) were used for comparison. Amino acids are sorted left to right based on the average GC content of the corresponding codons, listed in the bottom row.

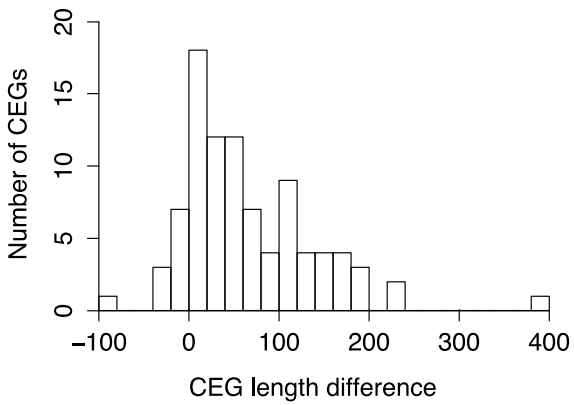

**Supplementary Figure 6.** Histogram of length differences between 91 orthologous CEGs (core eukaryotic genes) in Microsporidia and Fungi. Differences were calculated as the average amino acid length of the fungal CEG minus the average amino acid length of the microsporidial CEG. Fungi have significantly longer CEGs than Microsporidia ( $p < 1.68e-13$ ; Wilcoxon signed-rank test).

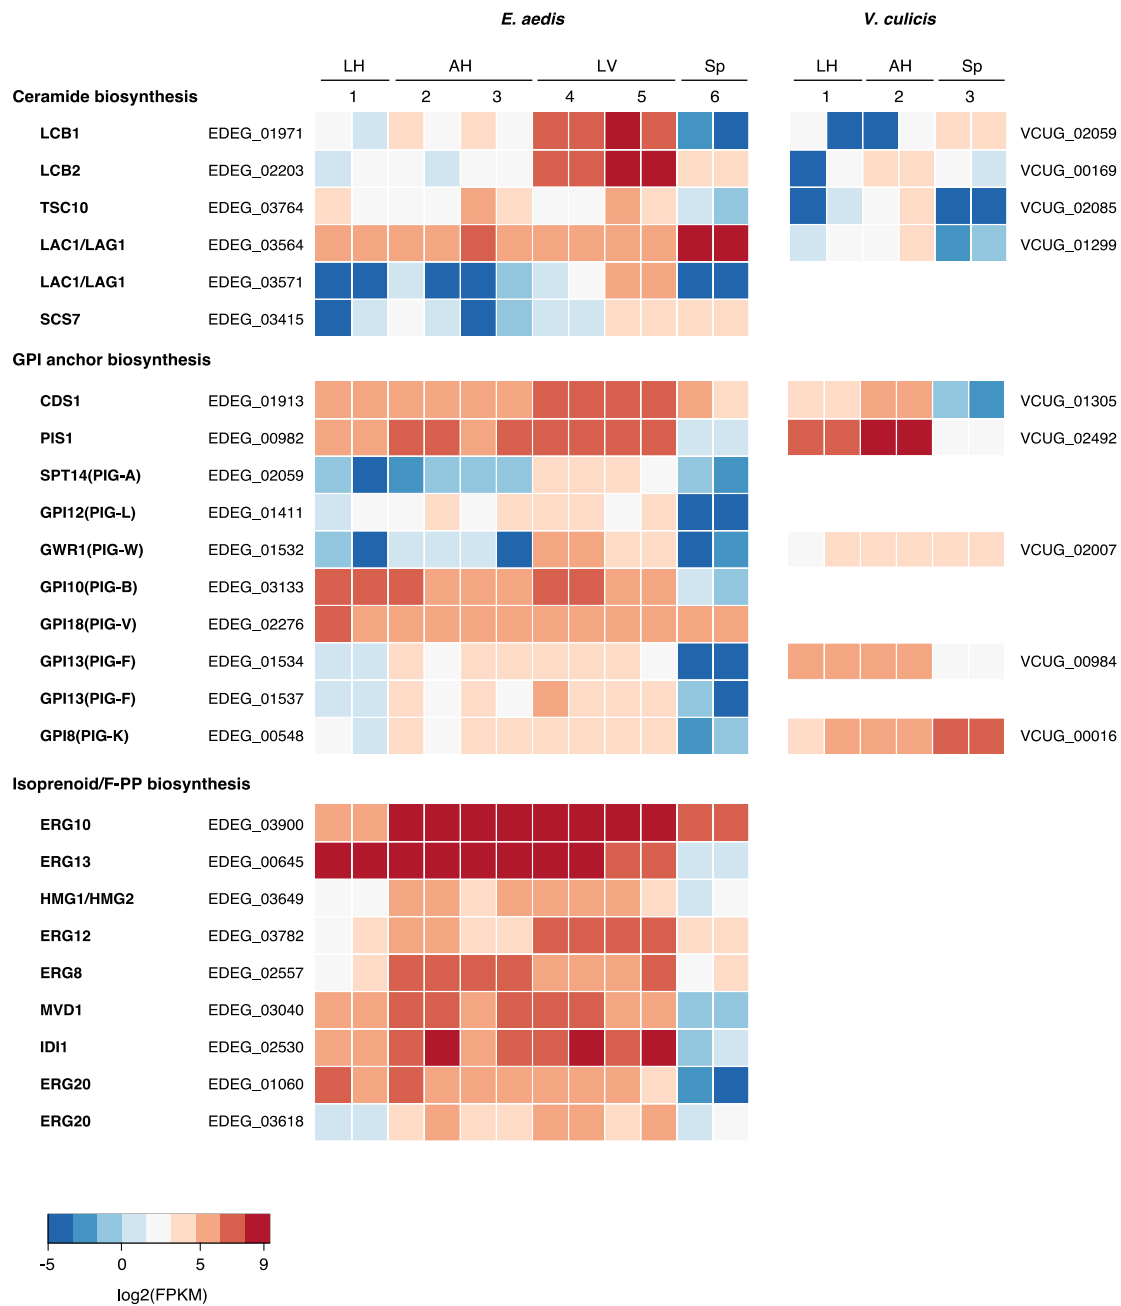

**Supplementary Figure 7.** Differential expression of metabolic pathways involved in signaling and cell membrane/protein decoration. Pathways shown include ceramide (sphingolipid) biosynthesis, GPI anchor biosynthesis, and isoprenoid biosynthesis. Absence of a row in *V. culicis* indicates that no ortholog exists for that gene. Sampling points are numbered as shown in Figure 1. LH: larval horizontal; AH: adult horizontal; LV: larval vertical; Sp: isolated spores.

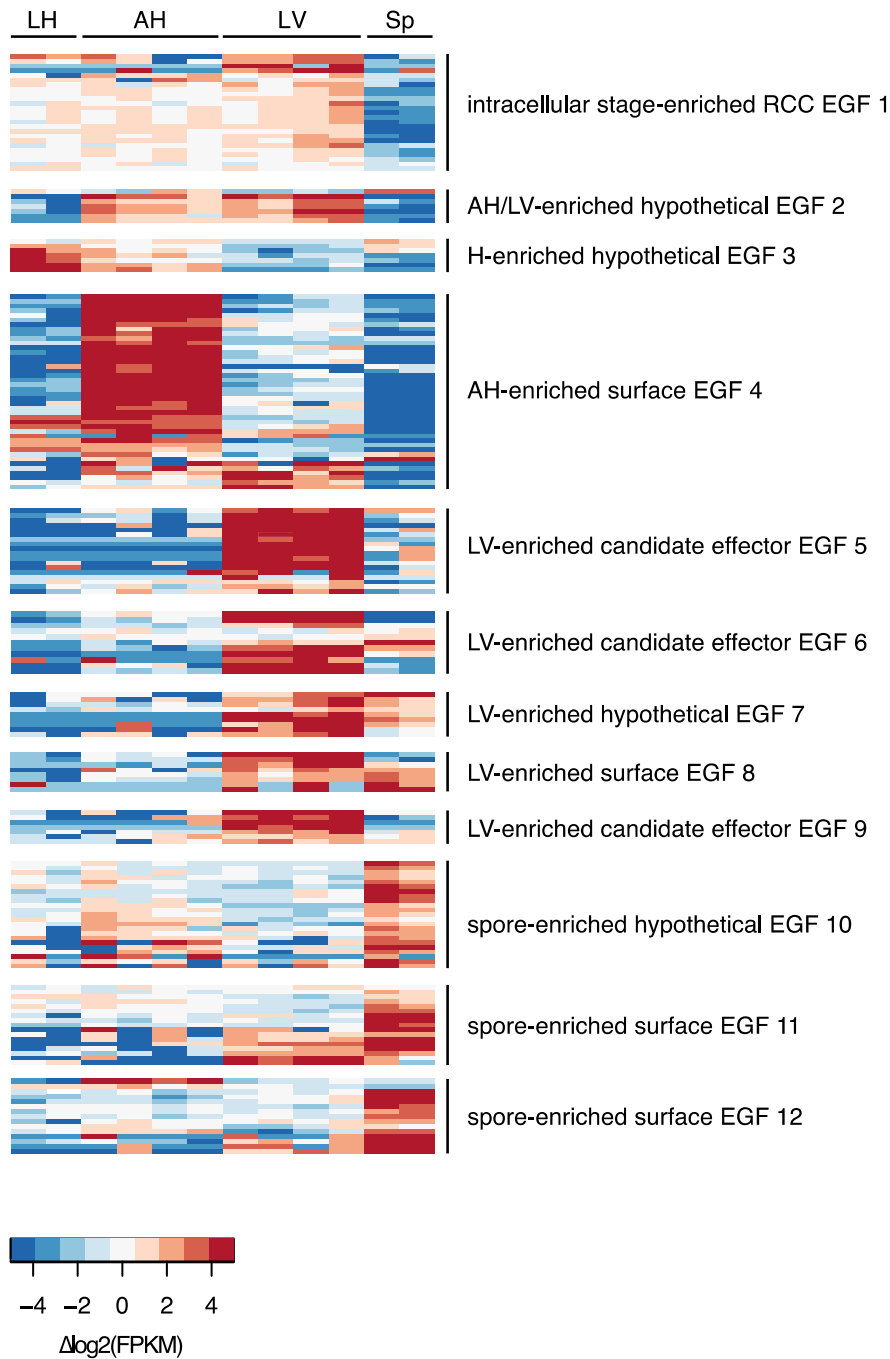

**Supplementary Figure 8.** Differentially expressed expanded gene families (EGFs) in *E. aedis*. Gene families are named after their phase of enrichment followed by their functional annotations. LH: larval horizontal; AH: adult horizontal; LV: larval vertical; Sp: isolated spores. Colors correspond to the change from the median in log-transformed FPKM.



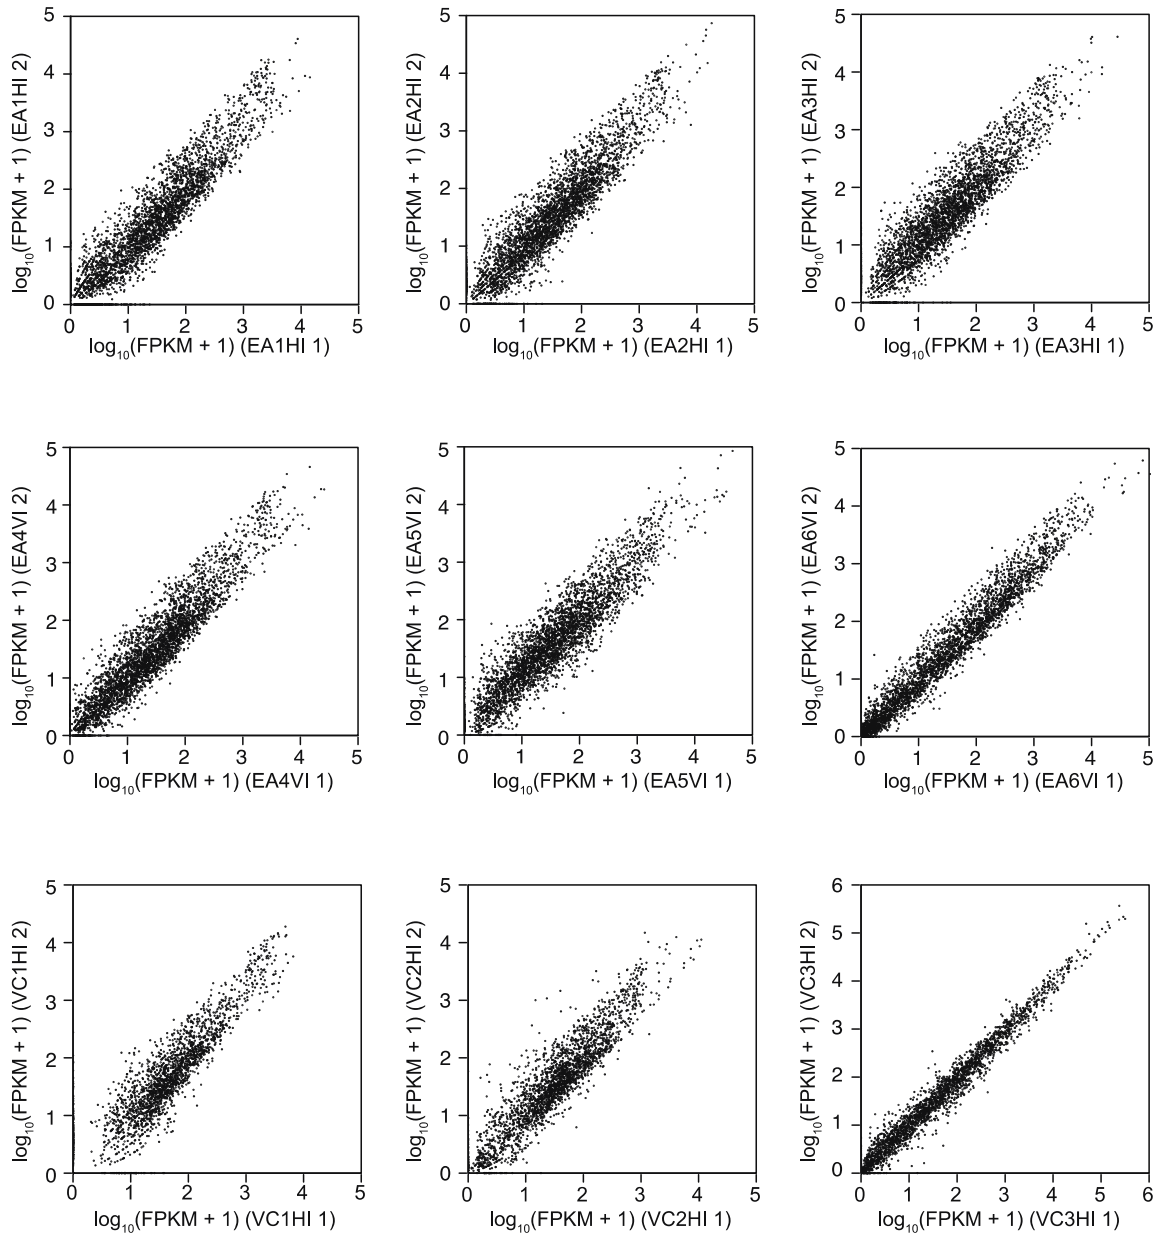

**Supplementary Figure 9.** Comparison of transcript FPKM values for biological replicates of *E. aedis* and *V. culicis*. To give more equal weight to genes with lower expression values, the  $\log_{10}$  values of the FPKM + 1 for each gene are plotted. Numbering of *E. aedis* (EA) and *V. culicis* (VC) samples is as described in the main text (Fig. 1); for each horizontal (H) or vertical (V) stage the two biological replicates are compared.

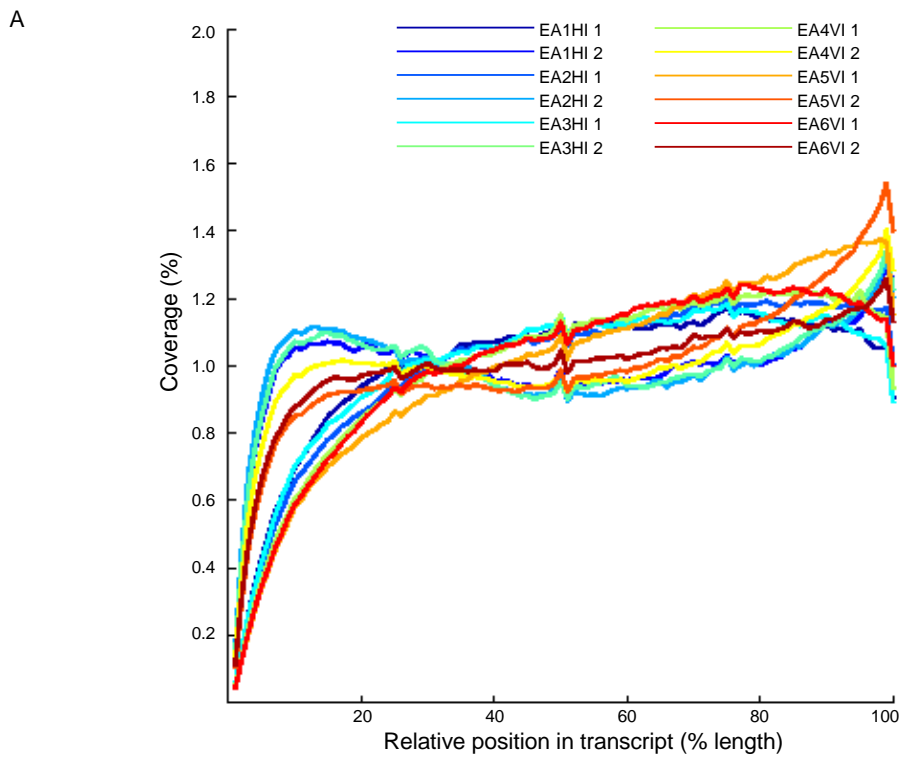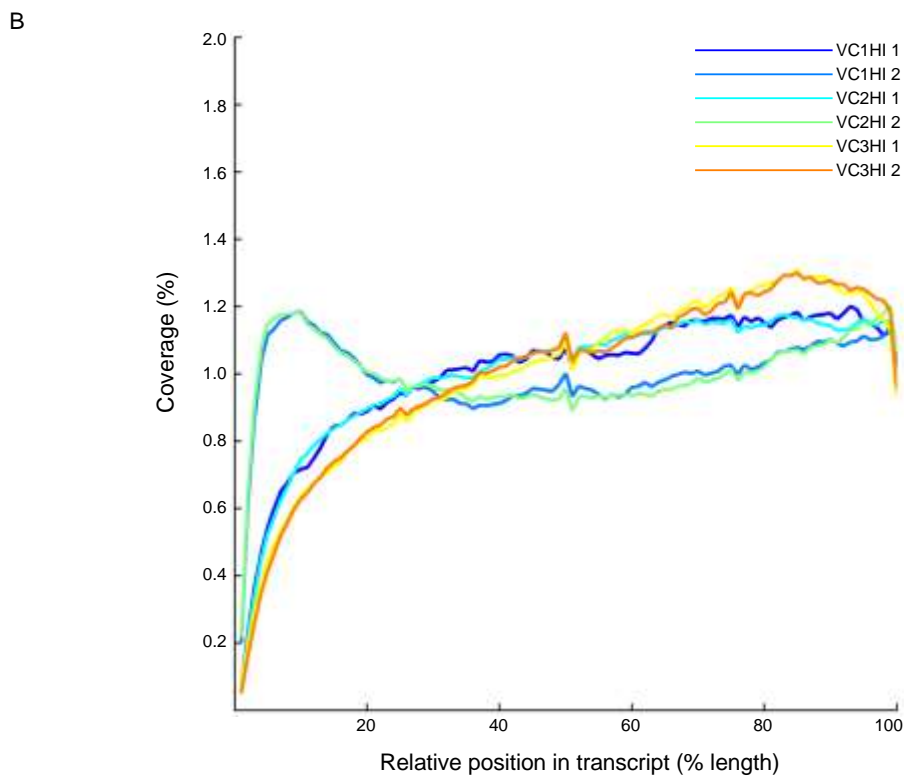

**Supplementary Figure 10.** Transcript coverage for RNA-Seq samples. Normalized coverage of RNA-Seq samples aligned to microsporidia transcripts is plotted at the relative position of transcript length for *E. aedis* and *V. culicis* samples (A, B).

**Supplementary Table 1.** *V. culicis* predicted introns. For each intron, the gene id, the name or function, the intron location (5' end, 3' end, or mid-gene), intron size, and percent of RNA-Seq data that was spliced for that intron (N/A values represent introns without RNA-Seq coverage) is provided. Multiple rows for a single gene indicate multiple introns in that gene. Genes combined with a plus indicate genes that were modeled as two intronless genes, but based on intron identification represent a single spliced gene.

| Gene ID                    | Gene Name / Function       | Intron Location | Intron Size (bases) | Percent Spliced |
|----------------------------|----------------------------|-----------------|---------------------|-----------------|
| VCUG_00040                 | surface                    | 3'              | 23                  | N/A             |
| VCUG_00092                 | PFAM:Sedlin_N              | 3'              | 23                  | 26.9            |
| VCUG_00161                 | surface                    | 3'              | 24                  | N/A             |
| VCUG_00234                 | PFAM:ThiF                  | 5'              | 22                  | 51.4            |
| VCUG_00244 +<br>VCUG_02834 | surface                    | mid             | 22                  | 50              |
| VCUG_00244 +<br>VCUG_02834 | surface                    | mid             | 22                  | 11.1            |
| VCUG_00376                 | cold shock                 | mid             | 24                  | 79.2            |
| VCUG_00403                 | S23                        |                 | 69                  | 69              |
| VCUG_00509                 | surface                    | 3'              | 19                  | N/A             |
| VCUG_00771                 | L18                        | 5'              | 23                  | 74.3            |
| VCUG_00792                 | peptidyl-tRNA<br>hydrolase | mid             | 22                  | 27.7            |
| VCUG_00981                 | surface                    | mid             | 22                  | 15.6            |
| VCUG_00982                 | surface                    | mid             | 23                  | 21.5            |
| VCUG_00982                 | surface                    | mid             | 22                  | 25.6            |
| VCUG_00983                 | surface                    | mid             | 23                  | 18.4            |
| VCUG_00983                 | surface                    | mid             | 22                  | 17.6            |
| VCUG_01015                 | S26                        | 5'              | 25                  | N/A             |
| VCUG_01407                 | surface                    | 3'              | 22                  | 19.4            |
| VCUG_01487                 | S27                        | 5'              | 28                  | N/A             |
| VCUG_02062                 | L24                        | 5'              | 28                  | N/A             |
| VCUG_02065                 | S17                        | 5'              | 25                  | N/A             |
| VCUG_02256 +<br>VCUG_02257 | surface                    | mid             | 23                  | 14.3            |
| VCUG_02405                 | surface                    | mid             | 23                  | 5.7             |
| VCUG_02406                 | surface                    | mid             | 23                  | 25              |
| VCUG_02406                 | surface                    | mid             | 22                  | 18.2            |
| VCUG_02407                 | surface                    | mid             | 23                  | 23.7            |
| VCUG_02407                 | surface                    | mid             | 22                  | 26.7            |
| VCUG_02408                 | surface                    | mid             | 22                  | 9.9             |
| VCUG_02408                 | surface                    | mid             | 23                  | 29.6            |
| VCUG_02506                 | L44                        | 5'*             | 38                  | N/A             |
| VCUG_02547                 | L1                         | 5'              | 26                  | 87.7            |
| unmodeled                  | L39                        | 5'              | 25                  | N/A             |
| unmodeled                  | surface                    | mid             | 22                  | 35.1            |

\*This intron has the motif, but with 15bp in the region near the 3' splice site previously described as being constrained to 3bp<sup>2</sup>.

**Supplementary Table 2.** Top 20 enriched GO terms in genes upregulated in *V. culicis* environmental spores. Starred values were significant at a 0.05 FDR.

| GO Term                                                       | P-value   |
|---------------------------------------------------------------|-----------|
| RNA processing [GO:0006396]                                   | 5.05E-07* |
| organic cyclic compound metabolic process [GO:1901360]        | 5.99E-07* |
| nucleobase-containing compound metabolic process [GO:0006139] | 6.78E-07* |
| RNA metabolic process [GO:0016070]                            | 9.15E-07* |
| cellular aromatic compound metabolic process [GO:0006725]     | 9.90E-07* |
| heterocycle metabolic process [GO:0046483]                    | 9.90E-07* |
| nucleic acid metabolic process [GO:0090304]                   | 2.21E-06* |
| gene expression [GO:0010467]                                  | 5.11E-06* |
| ncRNA processing [GO:0034470]                                 | 6.66E-06* |
| cellular nitrogen compound metabolic process [GO:0034641]     | 8.21E-06* |
| rRNA processing [GO:0006364]                                  | 1.18E-05* |
| nitrogen compound metabolic process [GO:0006807]              | 2.25E-05* |
| rRNA metabolic process [GO:0016072]                           | 9.09E-05* |
| ribonucleoprotein complex biogenesis [GO:0022613]             | 1.20E-04* |
| ncRNA metabolic process [GO:0034660]                          | 2.59E-04* |
| cellular component organization or biogenesis [GO:0071840]    | 8.55E-04  |
| chromatin organization [GO:0006325]                           | 0.001181  |
| ATP-dependent chromatin remodeling [GO:0043044]               | 0.001292  |
| nucleosome organization [GO:0034728]                          | 0.001375  |
| chromatin modification [GO:0016568]                           | 0.001479  |

**Supplementary Table 3.** Top 20 enriched GO terms in genes upregulated in *E. aedis* environmental spores. Starred values were significant at a 0.05 FDR.

| GO Term                                                                | P-value   |
|------------------------------------------------------------------------|-----------|
| ncRNA processing [GO:0034470]                                          | 1.20E-07* |
| rRNA processing [GO:0006364]                                           | 3.70E-07* |
| rRNA metabolic process [GO:0016072]                                    | 3.50E-06* |
| ribosome biogenesis [GO:0042254]                                       | 4.32E-06* |
| ribonucleoprotein complex biogenesis [GO:0022613]                      | 1.47E-05* |
| RNA processing [GO:0006396]                                            | 7.87E-05* |
| maturation of SSU-rRNA [GO:0030490]                                    | 1.87E-04  |
| ncRNA metabolic process [GO:0034660]                                   | 2.31E-04  |
| maturation of SSU-rRNA from tricistronic rRNA transcript [GO:0000462]  | 2.47E-04  |
| ribosomal small subunit biogenesis [GO:0042274]                        | 3.08E-04  |
| maturation of LSU-rRNA [GO:0000470]                                    | 5.73E-04  |
| maturation of LSU-rRNA from tricistronic rRNA transcript [GO:0000463]  | 0.001796  |
| ribosomal large subunit biogenesis [GO:0042273]                        | 0.002274  |
| maturation of 5.8S rRNA [GO:0000460]                                   | 0.003626  |
| maturation of 5.8S rRNA from tricistronic rRNA transcript [GO:0000466] | 0.003626  |
| nucleobase-containing compound metabolic process [GO:0006139]          | 0.004454  |
| RNA modification [GO:0009451]                                          | 0.005254  |
| cellular aromatic compound metabolic process [GO:0006725]              | 0.006512  |
| heterocycle metabolic process [GO:0046483]                             | 0.006512  |
| cellular component biogenesis [GO:0044085]                             | 0.007526  |

**Supplementary Table 4.** Top 20 enriched GO terms in genes upregulated in *V. culicis* intracellular stages. Starred values were significant at a 0.05 FDR.

| GO Term                                                     | P-value   |
|-------------------------------------------------------------|-----------|
| single-organism biosynthetic process [GO:0044711]           | 5.35E-06* |
| carbohydrate metabolic process [GO:0005975]                 | 7.04E-05  |
| monosaccharide metabolic process [GO:0005996]               | 7.61E-05  |
| single-organism carbohydrate metabolic process [GO:0044723] | 1.32E-04  |
| hexose metabolic process [GO:0019318]                       | 1.88E-04  |
| protein processing [GO:0016485]                             | 2.85E-04  |
| glucose metabolic process [GO:0006006]                      | 4.56E-04  |
| protein maturation [GO:0051604]                             | 6.90E-04  |
| carbohydrate catabolic process [GO:0016052]                 | 7.84E-04  |
| single-organism carbohydrate catabolic process [GO:0044724] | 7.84E-04  |
| cofactor metabolic process [GO:0051186]                     | 9.03E-04  |
| cellular protein complex assembly [GO:0043623]              | 0.00205   |
| DNA strand elongation [GO:0022616]                          | 0.002115  |
| lagging strand elongation [GO:0006273]                      | 0.002586  |
| organophosphate biosynthetic process [GO:0090407]           | 0.002627  |
| coenzyme metabolic process [GO:0006732]                     | 0.003941  |
| glycerophospholipid biosynthetic process [GO:0046474]       | 0.003941  |
| organonitrogen compound metabolic process [GO:1901564]      | 0.004211  |
| pyridine nucleotide metabolic process [GO:0019362]          | 0.004383  |
| nicotinamide nucleotide metabolic process [GO:0046496]      | 0.004383  |

**Supplementary Table 5.** Top 20 enriched GO terms in genes upregulated in *E. aedis* intracellular stages.

| GO Term                                                | P-value  |
|--------------------------------------------------------|----------|
| proteasomal protein catabolic process [GO:0010499]     | 1.06E-04 |
| vacuolar transport [GO:0007034]                        | 3.45E-04 |
| lipid metabolic process [GO:0006629]                   | 0.001041 |
| cellular protein complex assembly [GO:0043623]         | 0.001052 |
| catabolic process [GO:0009056]                         | 0.001678 |
| cellular lipid metabolic process [GO:0044255]          | 0.001749 |
| isoprenoid metabolic process [GO:0006720]              | 0.00176  |
| isoprenoid biosynthetic process [GO:0008299]           | 0.00176  |
| proteolysis [GO:0006508]                               | 0.001976 |
| lipid biosynthetic process [GO:0008610]                | 0.00234  |
| protein lipidation [GO:0006497]                        | 0.002387 |
| phosphatidylinositol biosynthetic process [GO:0006661] | 0.002387 |
| lipoprotein metabolic process [GO:0042157]             | 0.002387 |
| lipoprotein biosynthetic process [GO:0042158]          | 0.002387 |
| endomembrane system organization [GO:0010256]          | 0.002675 |
| GPI anchor metabolic process [GO:0006505]              | 0.002814 |
| GPI anchor biosynthetic process [GO:0006506]           | 0.002814 |
| glycolipid metabolic process [GO:0006664]              | 0.002814 |
| steroid metabolic process [GO:0008202]                 | 0.002814 |
| glycolipid biosynthetic process [GO:0009247]           | 0.002814 |

**Supplementary Table 6.** Top 20 enriched GO terms in genes upregulated in *E. aedis* vertically inherited intracellular stages vs. horizontally inherited stages in host larvae. Starred values were significant at a 0.05 FDR.

| GO Term                                                                                    | P-value   |
|--------------------------------------------------------------------------------------------|-----------|
| cellular lipid metabolic process [GO:0044255]                                              | 5.65E-06* |
| lipid metabolic process [GO:0006629]                                                       | 1.45E-05* |
| lipid biosynthetic process [GO:0008610]                                                    | 1.94E-05* |
| membrane lipid biosynthetic process [GO:0046467]                                           | 2.69E-05* |
| membrane lipid metabolic process [GO:0006643]                                              | 4.33E-05* |
| single-organism biosynthetic process [GO:0044711]                                          | 6.54E-05* |
| protein lipidation [GO:0006497]                                                            | 7.60E-05* |
| lipoprotein metabolic process [GO:0042157]                                                 | 7.60E-05* |
| lipoprotein biosynthetic process [GO:0042158]                                              | 7.60E-05* |
| generation of precursor metabolites and energy [GO:0006091]                                | 1.01E-04* |
| carbon catabolite activation of transcription from RNA polymerase II promoter [GO:0000436] | 2.76E-04  |
| regulation of cellular respiration [GO:0043457]                                            | 2.76E-04  |
| regulation of generation of precursor metabolites and energy [GO:0043467]                  | 2.76E-04  |
| carbon catabolite activation of transcription [GO:0045991]                                 | 2.76E-04  |
| organophosphate biosynthetic process [GO:0090407]                                          | 2.94E-04  |
| single-organism process [GO:0044699]                                                       | 3.29E-04  |
| phospholipid metabolic process [GO:0006644]                                                | 6.56E-04  |
| phospholipid biosynthetic process [GO:0008654]                                             | 7.08E-04  |
| carbon catabolite regulation of transcription from RNA polymerase II promoter [GO:0000429] | 0.001053  |
| carbon catabolite regulation of transcription [GO:0045990]                                 | 0.001053  |



**Supplementary Table 7.** Top 20 enriched GO terms in genes upregulated in *E. aedis* vertically inherited intracellular stages vs. horizontally inherited stages in host adults. Starred values were significant at a 0.05 FDR.

| GO Term                                                                                    | P-value   |
|--------------------------------------------------------------------------------------------|-----------|
| single-organism process [GO:0044699]                                                       | 4.18E-07* |
| single-organism cellular process [GO:0044763]                                              | 4.57E-06* |
| response to chemical stimulus [GO:0042221]                                                 | 2.93E-05* |
| single-organism biosynthetic process [GO:0044711]                                          | 3.97E-05* |
| cell communication [GO:0007154]                                                            | 7.70E-05* |
| generation of precursor metabolites and energy [GO:0006091]                                | 8.22E-05* |
| response to organic substance [GO:0010033]                                                 | 1.73E-04  |
| organophosphate biosynthetic process [GO:0090407]                                          | 1.78E-04  |
| phosphorus metabolic process [GO:0006793]                                                  | 1.80E-04  |
| membrane lipid biosynthetic process [GO:0046467]                                           | 1.81E-04  |
| membrane lipid metabolic process [GO:0006643]                                              | 2.87E-04  |
| sulfur compound metabolic process [GO:0006790]                                             | 6.37E-04  |
| regulation of signal transduction [GO:0009966]                                             | 6.44E-04  |
| regulation of signaling [GO:0023051]                                                       | 6.44E-04  |
| carbon catabolite activation of transcription from RNA polymerase II promoter [GO:0000436] | 6.55E-04  |
| regulation of cellular respiration [GO:0043457]                                            | 6.55E-04  |
| regulation of generation of precursor metabolites and energy [GO:0043467]                  | 6.55E-04  |
| carbon catabolite activation of transcription [GO:0045991]                                 | 6.55E-04  |
| nucleotide-sugar biosynthetic process [GO:0009226]                                         | 7.22E-04  |
| signaling [GO:0023052]                                                                     | 7.24E-04  |

**Supplementary Table 8.** Counts of differentially expressed genes in comparisons of infected versus control mosquitoes. Counts are based on FDR < 0.05.

| Comparison                                    | Up in infected | Up in control |
|-----------------------------------------------|----------------|---------------|
| <i>A. aegypti</i> - <i>E. aedis</i>           |                |               |
| 1 (LH)                                        | 63             | 52            |
| 2 (AH)                                        | 118            | 28            |
| 3 (AH)                                        | 193            | 16            |
| 4 (LV)                                        | 2              | 4             |
| 5 (LV)                                        | 39             | 119           |
| <i>A. quadrimaculatus</i> - <i>V. culicis</i> |                |               |
| 1 (LH)                                        | 5              | 0             |
| 2 (AH)                                        | 90             | 0             |

**Supplementary Table 9.** KEGG pathway enrichment in infected and control mosquitoes. Mosquito developmental stage and site of infection are listed for each timepoint. All significantly enriched terms in control and infected samples at each time point are shown for each species (q < 0.05, Fisher's exact test).

| KEGG Pathway                                                    | Representative Genes             | Up in   | q-value  |
|-----------------------------------------------------------------|----------------------------------|---------|----------|
| <b><i>Ae. aegypti</i> timepoint 1 (larval midgut)</b>           |                                  |         |          |
| ko00627 Aminobenzoate degradation                               | alkaline phosphatases            | control | 5.88E-04 |
| ko00790 Folate biosynthesis                                     | alkaline phosphatases            | control | 5.88E-04 |
| ko02020 Two-component system                                    | alkaline phosphatases            | control | 5.88E-04 |
| <b><i>Ae. aegypti</i> timepoint 2 (early adult oenocyte)</b>    |                                  |         |          |
| none                                                            |                                  |         |          |
| <b><i>Ae. aegypti</i> timepoint 3 (late adult oenocyte)</b>     |                                  |         |          |
| none                                                            |                                  |         |          |
| <b><i>Ae. aegypti</i> timepoint 4 (early larval fat body)</b>   |                                  |         |          |
| none                                                            |                                  |         |          |
| <b><i>Ae. aegypti</i> timepoint 5 (late larval fat body)</b>    |                                  |         |          |
| ko05016 Huntington's disease                                    | dynein                           | control | 1.31E-03 |
| <b><i>An. quadrimaculatus</i> timepoint 1 (larval systemic)</b> |                                  |         |          |
| none                                                            |                                  |         |          |
| <b><i>An. quadrimaculatus</i> timepoint 2 (adult systemic)</b>  |                                  |         |          |
| ko05412 Arrhythmogenic right ventricular cardiomyopathy         | actinin, ryanodine receptors     | control | 6.52E-04 |
| ko04260 Cardiac muscle contraction                              | tropomyosin, ryanodine receptors | control | 1.34E-03 |
| ko05410 Hypertrophic cardiomyopathy                             | tropomyosin, ryanodine receptors | control | 1.34E-03 |
| ko05414 Dilated cardiomyopathy                                  | tropomyosin, ryanodine receptors | control | 1.34E-03 |
| ko04261 Adrenergic signaling in cardiomyocytes                  | tropomyosin, ryanodine receptors | control | 1.11E-02 |

**Supplementary Table 10.** Glycolytic genes in *Ae. aegypti*.

| Gene ID                | Gene name                                   |
|------------------------|---------------------------------------------|
| AAEL009387             | hexokinase                                  |
| AAEL012994             | glucose-6-phosphate isomerase               |
| AAEL004295             | glucose-6-phosphatase                       |
| AAEL010590             | aldose-1-epimerase                          |
| AAEL007315,AAEL0152091 | glucose-6-phosphate 1-epimerase             |
| AAEL001158             | fructose-1,6-bisphosphatase                 |
| AAEL006895             | phosphofructokinase                         |
| AAEL005766             | fructose-bisphosphate aldolase              |
| AAEL001480,AAEL010037  | phosphoglucomutase                          |
| AAEL004988             | phosphoglycerate kinase                     |
| AAEL002542             | triosephosphate isomerase                   |
| AAEL006070             | phosphoglycerate mutase                     |
| AAEL001668             | enolase                                     |
| AAEL011421             | multiple inositol polyphosphate phosphatase |
| AAEL009507             | glucose-6-phosphate 1-dehydrogenase         |
| AAEL004434             | transketolase                               |
| AAEL009389             | transaldolase                               |
| AAEL003246             | deoxyribose-phosphate aldolase              |

**Supplementary Table 11.** Sequencing reads generated using 454 Technology.

|                   | Fragment Library |             | 3 kb Library |             |
|-------------------|------------------|-------------|--------------|-------------|
|                   | Reads            | Bases       | Reads        | Bases       |
| <i>E. aedis</i>   | 2,533,129        | 837,636,402 | 1,195,684    | 391,556,598 |
| <i>V. culicis</i> | 460,882          | 142,253,805 | 238,340      | 79,854,666  |

**Supplementary Table 12.** RNA-Seq read statistics and accession codes.

| Sample                  | SRA Accession code                    | Total Reads | PF Reads*  | PF Reads (%) | Average quality |
|-------------------------|---------------------------------------|-------------|------------|--------------|-----------------|
| <i>E. aedis</i> EA1HC   | SRX390041                             | 68,481,002  | 63,489,682 | 92.7%        | 31.69           |
| <i>E. aedis</i> EA1HC   | SRX737086                             | 87,486,894  | 81,161,346 | 92.8%        | 32.87           |
| <i>E. aedis</i> EA1HI   | SRX390044                             | 45,766,066  | 42,369,178 | 92.6%        | 31.54           |
| <i>E. aedis</i> EA1HI   | SRX737092                             | 81,974,890  | 75,920,986 | 92.6%        | 32.93           |
| <i>E. aedis</i> EA2HC   | SRX390045                             | 50,533,250  | 46,908,810 | 92.8%        | 31.91           |
| <i>E. aedis</i> EA2HC   | SRX737091                             | 81,825,558  | 75,965,252 | 92.8%        | 32.73           |
| <i>E. aedis</i> EA2HI   | SRX390046                             | 56,393,016  | 52,281,814 | 92.7%        | 31.87           |
| <i>E. aedis</i> EA2HI   | SRX737082                             | 90,429,928  | 83,621,422 | 92.5%        | 32.62           |
| <i>E. aedis</i> EA3HC   | SRX390047                             | 58,319,732  | 53,705,024 | 92.1%        | 31.13           |
| <i>E. aedis</i> EA3HC   | SRX737083                             | 76,927,998  | 70,691,960 | 91.9%        | 32.28           |
| <i>E. aedis</i> EA3HI   | SRX390048                             | 73,127,460  | 67,563,176 | 92.4%        | 31.42           |
| <i>E. aedis</i> EA3HI   | SRX737085                             | 80,626,540  | 74,571,242 | 92.5%        | 32.65           |
| <i>E. aedis</i> EA4VC   | SRX734310                             | 67,297,884  | 62,375,296 | 92.7%        | 31.66           |
| <i>E. aedis</i> EA4VC   | SRX736586;<br>SRX736585               | 80,417,528  | 74,058,262 | 92.1%        | 32.32           |
| <i>E. aedis</i> EA4VI   | SRX390049                             | 62,088,858  | 57,444,536 | 92.5%        | 31.72           |
| <i>E. aedis</i> EA4VI   | SRX737084                             | 78,049,988  | 72,567,846 | 93.0%        | 33.14           |
| <i>E. aedis</i> EA5VC   | SRX390050                             | 73,361,274  | 67,938,544 | 92.6%        | 31.38           |
| <i>E. aedis</i> EA5VC   | SRX737093                             | 82,231,070  | 76,588,864 | 93.1%        | 32.75           |
| <i>E. aedis</i> EA5VI   | SRX390051                             | 83,944,952  | 77,871,896 | 92.8%        | 32.02           |
| <i>E. aedis</i> EA5VI   | SRX737088                             | 85,566,354  | 79,363,336 | 92.8%        | 32.80           |
| <i>E. aedis</i> EA6V    | SRX390052                             | 81,002,448  | 75,548,002 | 93.3%        | 31.74           |
| <i>E. aedis</i> EA6V    | SRX737094                             | 83,917,140  | 78,633,420 | 93.7%        | 34.04           |
| <i>V. culicis</i> VC1HC | SRX390056                             | 63,192,238  | 57,984,960 | 91.8%        | 30.52           |
| <i>V. culicis</i> VC1HC | SRX709711;<br>SRX709708               | 65,141,412  | 58,906,006 | 90.4%        | 29.23           |
| <i>V. culicis</i> VC1HI | SRX390057                             | 68,314,474  | 62,700,460 | 91.8%        | 30.01           |
| <i>V. culicis</i> VC1HI | SRX709709;<br>SRX709704               | 86,111,938  | 78,678,462 | 91.4%        | 31.16           |
| <i>V. culicis</i> VC2HC | SRX390058                             | 61,729,818  | 56,497,816 | 91.5%        | 30.32           |
| <i>V. culicis</i> VC2HC | SRX709712;<br>SRX709705               | 75,560,562  | 69,398,664 | 91.8%        | 31.53           |
| <i>V. culicis</i> VC2HI | SRX390059                             | 57,613,564  | 52,927,206 | 91.9%        | 30.96           |
| <i>V. culicis</i> VC2HI | SRX709710;<br>SRX709707               | 75,204,770  | 69,149,806 | 91.9%        | 31.62           |
| <i>V. culicis</i> VC3H  | SRX390055;<br>SRX390054;<br>SRX390053 | 72,151,970  | 69,529,002 | 96.4%        | 34.62           |
| <i>V. culicis</i> VC3H  | SRX470848;<br>SRX465842               | 88,756,302  | 79,192,556 | 89.2%        | 33.93           |

\*Illumina Passing Filter (PF).

### **Supplementary Note 1: AT-rich expansion and codon/amino acid usage bias in *E. aedis***

Both genes and repetitive sequences are distributed across the *E. aedis* assembly, with no large regions absent of genes or repeats. The lengths of intergenic regions in *E. aedis* follow a bimodal distribution, in which most pairs of genes are separated by large intergenic regions but some have remained closely linked (**Supplementary Fig. 3**).

Comparing the relative codon usage for a given amino acid for *E. aedis* and *V. culicis*, AT-rich codon frequencies are increased and the GC-rich codon frequencies are decreased (**Supplementary Fig. 4, Supplementary Fig. 5**). This AT-bias has also impacted the frequencies of amino acids found in proteins. In *E. aedis* proteins, amino acids with the highest average GC of their codons are under-represented while amino acids with the lowest average GC of their codons are over-represented, even when only conserved genes are considered (**Supplementary Fig. 5**). A similar bias in amino acid usage has been previously reported for other AT-rich genomes <sup>3</sup>.

### **Supplementary Note 2: Phylogenetic position of *E. aedis***

While all nodes in this phylogeny displayed high bootstrap support, analysis of individual gene trees uncovered discrepant branching order around some tree nodes. We therefore calculated gene support frequencies (GSF) <sup>4</sup>, i.e. the percentage of individual core gene trees that supported each node in the tree, using RAxML to estimate trees for individual single copy core genes under the same model as the concatenated gene tree. This revealed a low GSF at the base of the branch to *E. aedis*. Removing genes with low phylogenetic signal from the analysis (gene trees with bootstrap support < 80) and re-estimating the phylogeny with the 71 well supported genes, as suggested in ref. <sup>4</sup> did not improve support for the placement of *E. aedis* (**Supplementary Fig. 2**). This calls into question the phylogenetic placement of this species and suggests that more taxa may be needed to fully resolve the basal branching order. The genome-wide low GC content likely contributes to the difficulty in robustly placing *E. aedis* on the microsporidian phylogeny.

### **Supplementary Note 3: Genome compaction**

Another strategy for genome compaction is the reduction of protein length, as previously shown the genes in *Encephalitizoon cuniculi*, *Enterocytozoon bienusi*, and *Octospora bayeri* compared to fungal orthologs <sup>5,6</sup>. Here, analysis of core eukaryotic genes (CEGs, <sup>7</sup>) revealed more broadly

that Microsporidia CEGs overall have shorter coding sequences than their fungal orthologs. We compared 91 CEGs found in most of our microsporidian and fungal genomes and found that fungal CEGs are significantly longer than microsporidian CEGs ( $p < 1.68e-13$ ; Wilcoxon signed-rank test). The average difference is 66.1 +/- 72.6 amino acids, and a histogram of these differences is shown in **Supplementary Fig. 6**. This suggests that not only are there evolutionary constraints on microsporidian gene content and intron structure, but coding sequencing length as well.

#### **Supplementary Note 4: Pathway loss in *E. aedis* and *V. culicis***

Genome compact has also occurred by loss of metabolic pathways, though different species have lost or retained different pathways. The *V. culicis* genome has lost five genes the GPI anchor biosynthesis pathway, leaving only *GPI8*, *GPI13*, and *GWT1*; in addition, the GPI anchor synthesis gene *GPI10* has been lost in all Microsporidia except *E. aedis* and *Nematocida*. It is unclear whether these reduced complements of GPI anchor synthesis genes allow *V. culicis* to manufacture GPI anchors, or if these genes have acquired some functional redundancy in another pathway. The *V. culicis* genome also encodes a reduced sphingolipid biosynthesis pathway relative to *E. aedis* (**Fig. 2A**). The *V. culicis* genome encodes a single ceramide synthase as the final step of this pathway, while the *E. aedis* genome encodes two ceramide synthases (paralogs of each other), and also the next enzyme in the pathway, *SCS7* desaturase (along with its *CYB5* cofactor), which allows for the production of more complex ceramides. The *V. culicis* genome does encode phosphatidylserine decarboxylase, which is involved in the synthesis of aminophospholipids, whereas the *E. aedis* genome lacks this pathway. The phylogenetic distribution of the isoprenoid pathway is nearly the opposite of phosphatidylserine decarboxylase (**Fig. 2A**), and these two pathways may in some way encode some functional redundancy. Outside of metabolism, the *E. aedis* genome encodes three genes (*SSU72*, *ESS1*, and *SPO14*) involved in Ser5 and Ser7 phosphorylation of RNA polymerase II that are all missing from the *V. culicis* genome.

#### **Supplementary Note 5: Spliced genes in *V. culicis***

While introns are conserved in similar genes across different Microsporidia species, RNA-Seq reveals that introns are not excised in many transcripts in *V. culicis*. The 27 spliced genes identified in *V. culicis* include eight ribosomal protein genes (RPGs), 15 genes with transmembrane domains, and four other genes with known domains (**Supplementary Table 1**). RPG introns, typically found near the 5' end of genes, included orthologs of the RPGs identified

as spliced in the *T. hominis* genome<sup>8</sup> plus the L1 RPG. Spliced genes with transmembrane domains had introns in the middle portion of the gene, and six of the genes contained two introns each separated by an 11 base exon. Splicing of these introns was variable; there were RNA-Seq based transcripts with no introns spliced out, both introns spliced out, and either the first or second transcript spliced. Intron retention produces a heavily truncated protein, suggesting alternative splicing does not produce variation in cell surface proteins. As in *En. cuniculi*<sup>9</sup>, the majority of *V. culicis* genes in all three functional classes were inefficiently spliced (median efficiency = 25.3%, **Supplementary Table 1**); the differential splicing of surface proteins may simply result from this inefficiency.

### **Supplementary Note 6: Phylogenetic profiling of proteins associated with splicing**

To search for genes encoding other potential pre-mRNA splicing factors in Microsporidia, we searched for genes whose phylogenetic profile matched species with verified splicing. Genes matching this profile are found in at least 5 of the 9 Microsporidia with splicing but are absent in all the species without splicing (**Supplementary Data 2**). Of the 29 gene clusters that matched this pattern, 13 were broadly conserved with other fungi while 16 were largely specific to Microsporidia. Eleven genes also conserved among fungi are known components of the spliceosome, including Sm proteins (D1, D2, D3, and F), U2 snRNP proteins (Cus1, Hsh155, Prp9, and Prp11), a U1 snRNP protein (Luc7) and other splicing factors (Bud31, Yju2). Of the 16 other clusters enriched in or specific to Microsporidia, two are involved in polyadenylation. In addition, given that the majority of genes shared with Fungi are known to be involved in splicing, some fraction of the Microsporidia-specific set, including 10 clusters without assigned function, could represent proteins involved in Microsporidia-specific splicing functions.

### **Supplementary Note 7: Gene-level examination of pathway enrichment in intracellular stages of *E. aedis***

We conducted gene level examination of pathways identified as being enriched in intracellular stages of *E. aedis*. This revealed that GPI anchor construction and isoprenoid synthesis components were nearly universally upregulated in intracellular stages (**Supplementary Fig. 7**). *CYB5*, a cofactor in isoprenoid biosynthesis, was also significantly upregulated ( $q < 1.2e-5$ ). Furthermore, of the five COPI subunits identified in *E. aedis* (*COP1*, *RET3*, *SEC21*, *SEC26*, *SEC27*), all were significantly upregulated in intracellular stages. COPI normally plays a role in Golgi-to-ER transport, and potentially intra-Golgi transport, although a study of *A. locustae* showed COPI and COPII vesicles were not formed<sup>10</sup>. However, among Microsporidia *A.*

*locustae* uniquely lacks much of the COPII machinery based on our ortholog analysis; this leaves open the possibility that COPI and COPII function differently in *A. locustae* than other Microsporidia. In addition to potential roles in trafficking proteins for secretion, upregulation of COPI machinery may be related to spore production, as the Golgi and ER play a central role in microsporidian spore morphogenesis and/or cell structure, as microsporidian spores lack Golgi

11.



## Supplementary References

1. Stamatakis, A. RAxML-VI-HPC: maximum likelihood-based phylogenetic analyses with thousands of taxa and mixed models. *Bioinformatics* **22**, 2688–90 (2006).
2. Lee, R. C. H., Gill, E. E., Roy, S. W. & Fast, N. M. Constrained intron structures in a microsporidian. *Mol. Biol. Evol.* **27**, 1979–1982 (2010).
3. Singer, G. A. C. & Hickey, D. A. Nucleotide Bias Causes a Genomewide Bias in the Amino Acid Composition of Proteins. *Mol. Biol. Evol.* **17**, 1581–1588 (2000).
4. Salichos, L. & Rokas, A. Inferring ancient divergences requires genes with strong phylogenetic signals. *Nature* **497**, 327–331 (2013).
5. Katinka, M. D. *et al.* Genome sequence and gene compaction of the eukaryote parasite *Encephalitozoon cuniculi*. *Nature* **414**, 450–3 (2001).
6. Corradi, N., Haag, K. L., Pombert, J.-F., Ebert, D. & Keeling, P. J. Draft genome sequence of the *Daphnia* pathogen *Octospora bayeri*: insights into the gene content of a large microsporidian genome and a model for host-parasite interactions. *Genome Biol.* **10**, R106 (2009).
7. Parra, G., Bradnam, K. & Korf, I. CEGMA: a pipeline to accurately annotate core genes in eukaryotic genomes. *Bioinforma. Oxf. Engl.* **23**, 1061–1067 (2007).
8. Heinz, E. *et al.* The genome of the obligate intracellular parasite *Trachipleistophora hominis*: new insights into microsporidian genome dynamics and reductive evolution. *PLoS Pathog.* **8**, e1002979 (2012).
9. Grisdale, C. J., Bowers, L. C., Didier, E. S. & Fast, N. M. Transcriptome analysis of the parasite *Encephalitozoon cuniculi*: an in-depth examination of pre-mRNA splicing in a reduced eukaryote. *BMC Genomics* **14**, 207 (2013).
10. Beznoussenko, G. V. *et al.* Analogs of the Golgi complex in microsporidia: structure and vesicular mechanisms of function. *J. Cell Sci.* **120**, 1288–1298 (2007).
11. Vávra, J. & Larsson, J. I. in *Microsporidia: Pathogens of Opportunity* (eds. Weiss, L. M. & Becnel, J. J.) 1–70 (John Wiley and Sons, 2014).
